# Supplementary figures and images for: Does the human placenta express the canonical cell entry mediators for SARS-CoV-2?
Source: eLife journal article supplement (doi:10.7554/elife.58716), 2020-07-13

Figure 2-figure supplement 1

Gene expression for BSG (ENSG00000172270.18)

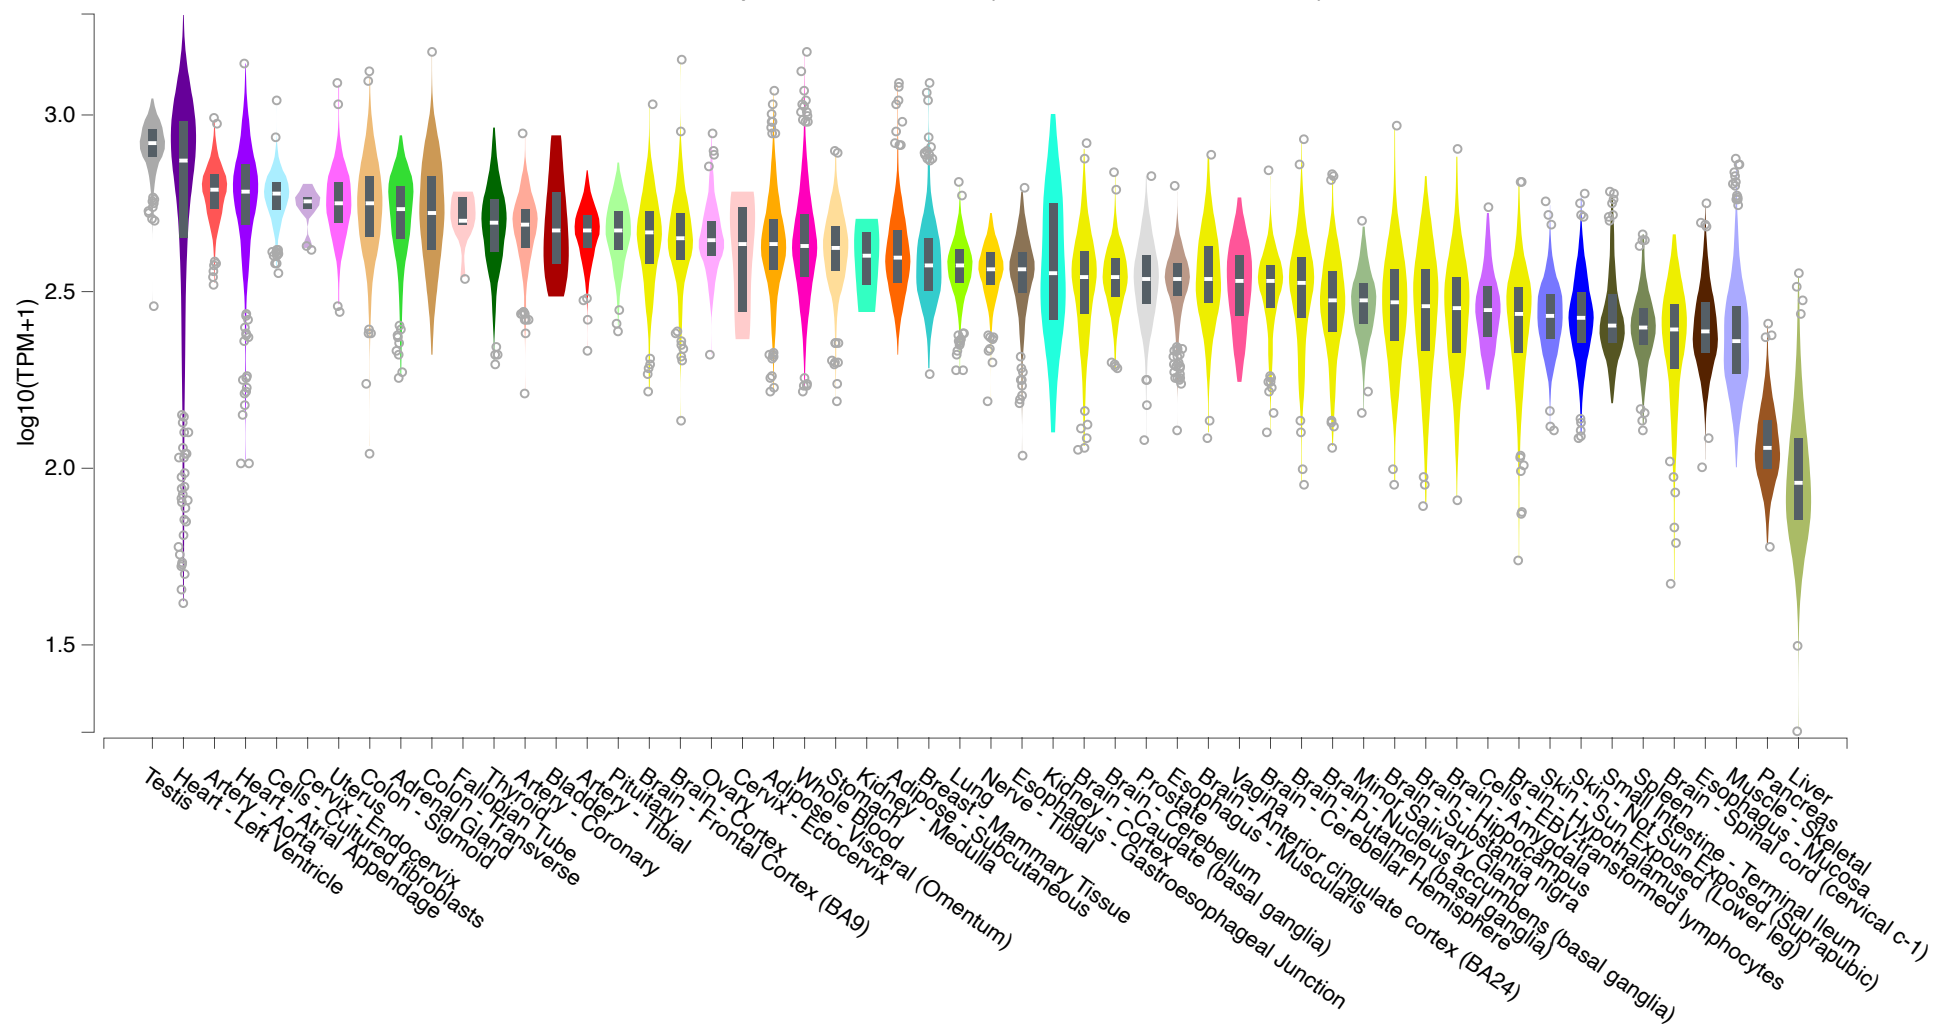

Supplement: supp [file elife-58716-supp-v1.zip]

FIGURE 1-figure supplement 1

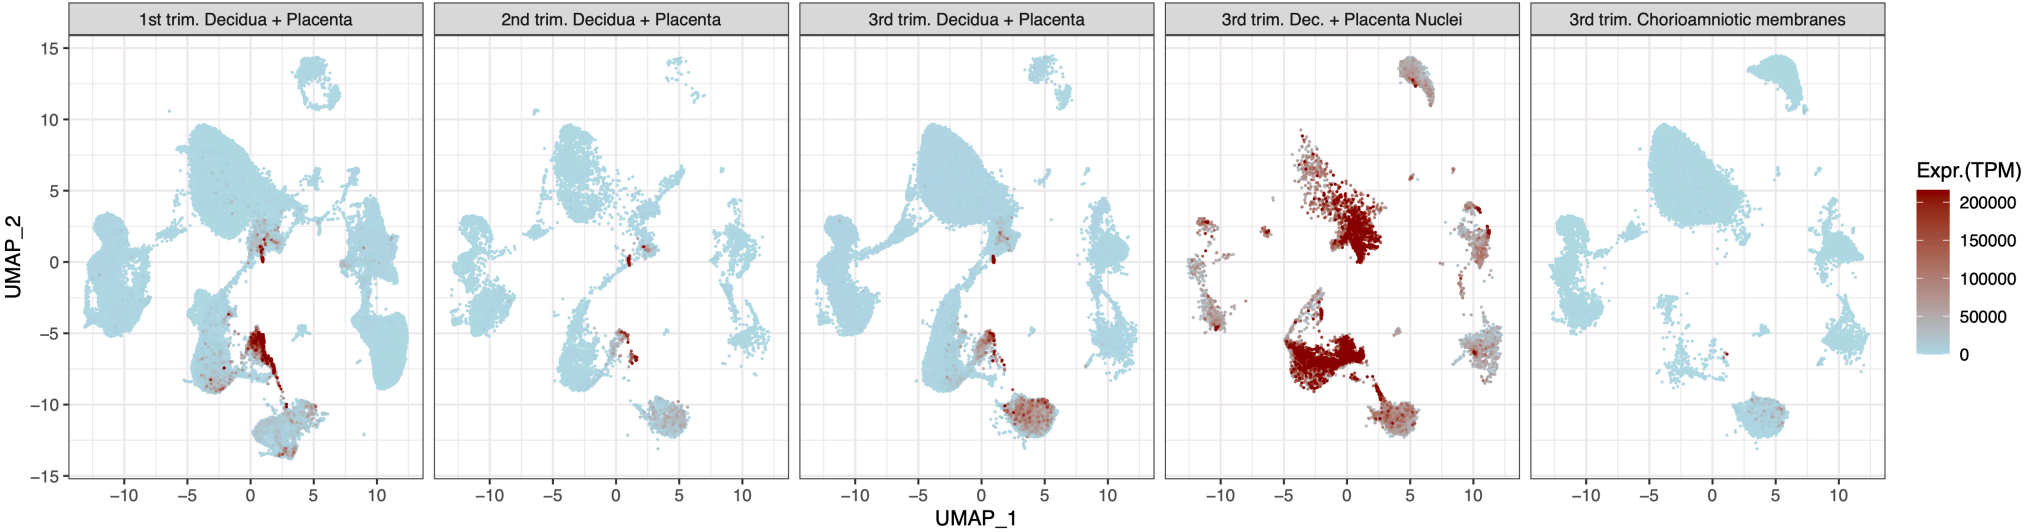

Supplement: supp [file elife-58716-supp-v1.zip]

Figure 2-supp. 2

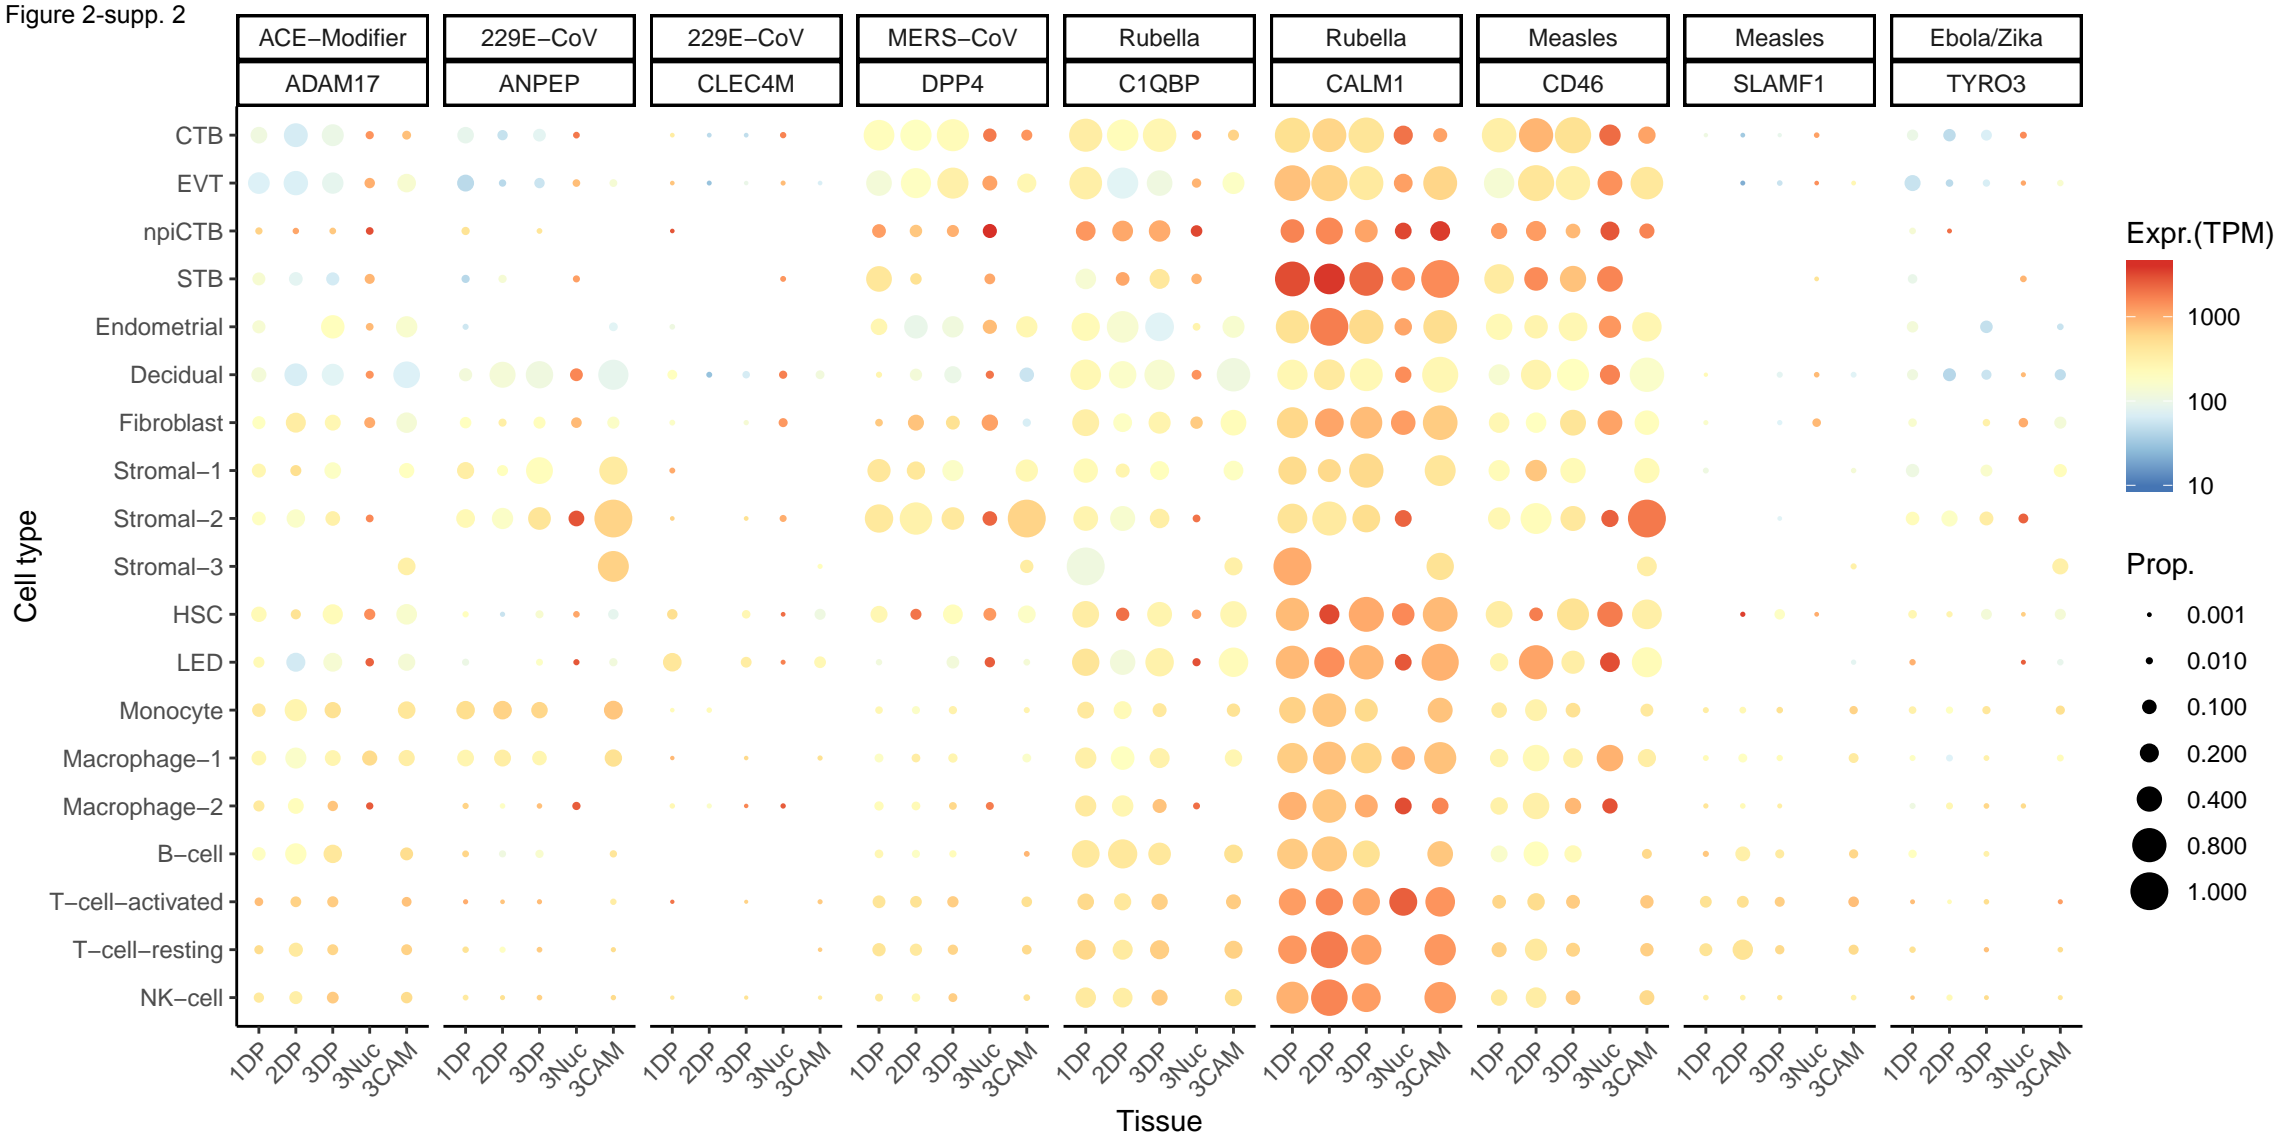

Supplement: supp [file elife-58716-supp-v1.zip]
